# Supplementary material
Source: PubMed Central journal article supplement (PMC4548281)
Supplement: supp_WNL.0000000000001844_Supplemental_data.pdf [file supp_WNL.0000000000001844_Supplemental_data.pdf]

**Table e-1. Distribution of patients at each value of 90-day mRS among two study groups**

| <i>mRS</i> | <i>Aspirin</i><br>( <i>n</i> =2569) | <i>Clopidogrel and Aspirin</i><br>( <i>n</i> =2562) |
|------------|-------------------------------------|-----------------------------------------------------|
| <i>0</i>   | <i>1573</i>                         | <i>1551</i>                                         |
| <i>1</i>   | <i>697</i>                          | <i>757</i>                                          |
| <i>2</i>   | <i>102</i>                          | <i>94</i>                                           |
| <i>3</i>   | <i>50</i>                           | <i>43</i>                                           |
| <i>4</i>   | <i>122</i>                          | <i>92</i>                                           |
| <i>5</i>   | <i>15</i>                           | <i>15</i>                                           |
| <i>6</i>   | <i>10</i>                           | <i>10</i>                                           |

**Table e-2. Demographic and clinical characteristics between two study groups in no-stroke population**

| Characteristics                             | Overall<br>(N=4616) | Aspirin<br>(N=2266) | Clopidogrel and Aspirin<br>(N=2350) | P value |
|---------------------------------------------|---------------------|---------------------|-------------------------------------|---------|
| Age, median (IQR), year                     | 62.1 (54.6-71.1)    | 61.8 (54.2-70.8)    | 62.5 (54.9-71.5)                    | 0.04    |
| Female, n (%)                               | 1543 (33.4)         | 779 (34.4%)         | 764 (32.5)                          | 0.18    |
| Systolic BP >140 mmHg, n (%)                | 3352 (72.7)         | 1633 (72.1)         | 1719 (73.2)                         | 0.40    |
| Diastolic BP >90 mmHg, n (%)                | 2405 (52.1)         | 1178 (52.0)         | 1227 (52.2)                         | 0.88    |
| Medical history                             |                     |                     |                                     |         |
| Stroke or TIA, n (%)                        | 1053 (22.8)         | 511 (22.6)          | 542 (23.1)                          | 0.68    |
| Hypertension, n (%)                         | 2999 (65.0)         | 1454 (64.2)         | 1545 (65.7)                         | 0.26    |
| Dyslipidemia, n (%)                         | 510 (11.0)          | 254 (11.2)          | 256 (10.9)                          | 0.73    |
| Coronary heart disease, n (%)               | 237 (5.1)           | 118 (5.2)           | 119 (5.1)                           | 0.83    |
| Known atrial fibrillation or flutter, n (%) | 156 (3.4)           | 73 (3.2)            | 83 (3.5)                            | 0.56    |

|                                                   |                  |                  |                  |      |
|---------------------------------------------------|------------------|------------------|------------------|------|
| Current or previous smoking, n (%)                | 1996 (43.2)      | 968 (42.7)       | 1028 (43.7)      | 0.48 |
| Heavy alcohol, n (%)                              | 1431 (31.0)      | 696 (30.7)       | 735 (31.3)       | 0.68 |
| BMI at admission, median (IQR), kg/m <sup>2</sup> | 24.5 (22.7-26.4) | 24.5 (22.9-26.5) | 24.4 (22.6-26.3) | 0.06 |
| Time to randomization (< 12 hours), n (%)         | 2268 (49.1)      | 1109 (48.9)      | 1159 (49.3)      | 0.80 |
| NIHSS score at baseline, median (IQR)             | 1 (0-2)          | 1 (0-2)          | 1 (0-2)          | 0.32 |
| mRS score before the onset of index events        |                  |                  |                  | 0.60 |
| 0                                                 | 3806 (82.5)      | 1880 (83.0)      | 1926 (82.0)      |      |
| 1                                                 | 689 (14.9)       | 326 (14.4)       | 363 (15.4)       |      |
| 2                                                 | 121 (2.6)        | 60 (2.6)         | 61 (2.6)         |      |
| Qualifying events                                 |                  |                  |                  | 0.75 |
| Minor stroke, n (%)                               | 3314 (71.8)      | 1622 (71.6)      | 1692 (72.0)      |      |
| High-risk TIA, n (%)                              | 1302 (28.2)      | 644 (28.4)       | 658 (28.0)       |      |

---

TIA denotes Transient Ischemic Attack; IQR, Interquartile Range; BP, Blood Pressure; BMI, Body Mass Index; NIHSS, National Institutes of Health Stroke Scale;

mRS, Modified Rankin Scale;

**Table e-3. Demographic and clinical characteristics between two study groups in stroke population**

| Characteristics                             | Overall<br>(N=515) | Aspirin<br>(N=303) | Clopidogrel and Aspirin<br>(N=212) | P value |
|---------------------------------------------|--------------------|--------------------|------------------------------------|---------|
| Age, median (IQR), year                     | 63.8 (56.0-73.0)   | 63.6 (56.0-73.4)   | 64.1 (55.9-71.9)                   | 0.70    |
| Female, n (%)                               | 195 (37.9)         | 113 (37.3)         | 82 (38.7)                          | 0.75    |
| Systolic BP >140 mmHg, n (%)                | 415 (80.7)         | 250 (82.5)         | 165 (78.2)                         | 0.22    |
| Diastolic BP >90 mmHg, n (%)                | 290 (56.3)         | 182 (60.1)         | 108 (50.9)                         | 0.04    |
| Medical history                             |                    |                    |                                    |         |
| Stroke or TIA, n (%)                        | 113 (21.9)         | 65 (21.5)          | 48 (22.6)                          | 0.75    |
| Hypertension, n (%)                         | 378 (73.4)         | 220 (72.6)         | 158 (74.5)                         | 0.63    |
| Dyslipidemia, n (%)                         | 56 (10.9)          | 26 (8.6)           | 30 (14.2)                          | 0.05    |
| Coronary heart disease, n (%)               | 20 (3.9)           | 14 (4.6)           | 6 (2.8)                            | 0.30    |
| Known atrial fibrillation or flutter, n (%) | 19 (3.7)           | 14 (4.6)           | 5 (2.4)                            | 0.18    |

|                                                   |                  |                  |                  |      |
|---------------------------------------------------|------------------|------------------|------------------|------|
| Current or previous smoking, n (%)                | 204 (39.6)       | 129 (42.6)       | 75 (35.4)        | 0.10 |
| Heavy alcohol, n (%)                              | 157 (30.5)       | 97 (32.0)        | 60 (28.3)        | 0.37 |
| BMI at admission, median (IQR), kg/m <sup>2</sup> | 25.0 (22.9-26.7) | 24.9 (22.8-26.7) | 25.1 (23.0-26.8) | 0.58 |
| Time to randomization (< 12 hours), n (%)         | 287 (55.7)       | 162 (53.5)       | 125 (59.0)       | 0.22 |
| NIHSS score at baseline, median (IQR)             | 2 (1-3)          | 2 (1-3)          | 2 (1-3)          | 0.04 |
| mRS score before the onset of index events        |                  |                  |                  | 0.86 |
| 0                                                 | 427 (82.9)       | 253 (83.5)       | 174 (82.1)       |      |
| 1                                                 | 71 (13.8)        | 41 (13.5)        | 30 (14.2)        |      |
| 2                                                 | 17 (3.3)         | 9 (3.0)          | 8 (3.8)          |      |
| Qualifying events                                 |                  |                  |                  | 0.72 |
| Minor stroke, n (%)                               | 382 (74.2)       | 223 (73.6)       | 159 (75.0)       |      |
| High-risk TIA, n (%)                              | 133 (25.8)       | 80 (26.4)        | 53 (25.0)        |      |

---

TIA denotes Transient Ischemic Attack; IQR, Interquartile Range; BP, Blood Pressure; BMI, Body Mass Index; NIHSS, National Institutes of Health Stroke Scale;

mRS, Modified Rankin Scale;

**Figure e-1.** Percentage distribution of response to the EQ-5D questionnaire among two study groups at 90-day follow-up

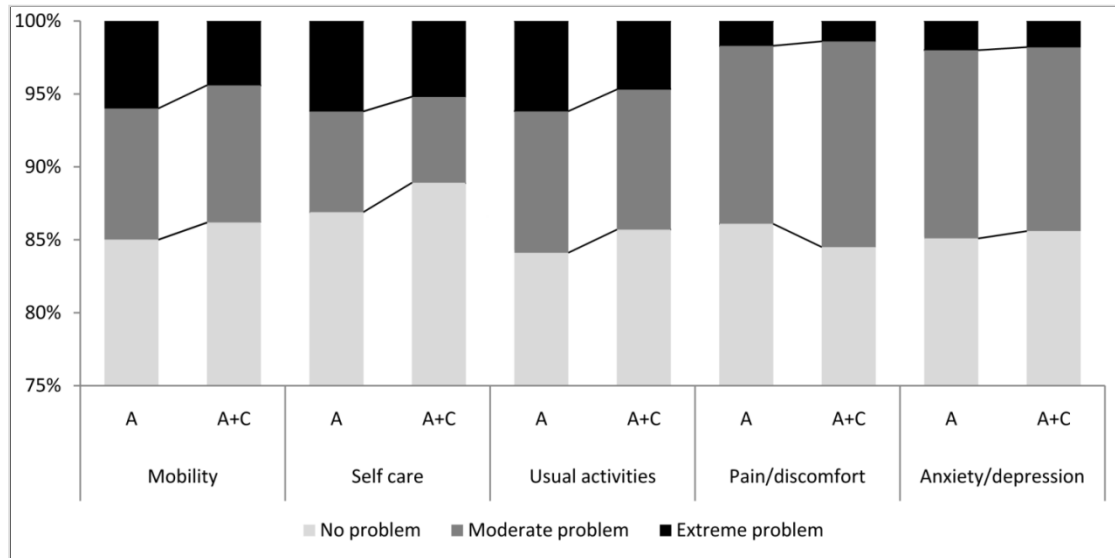

EQ-5D, EuroQol-5 Dimensions; A, Aspirin; C, Clopidogrel.
